# Supplementary material
Source: Springer Nature journal article supplement (https://www.springermedizin.de/resource/supplementary/12874_2013_1012_MOESM4_ESM.pdf/9433074)

**HEALTH OR  
TREATMENT-TAKING  
EXPERIENCE**

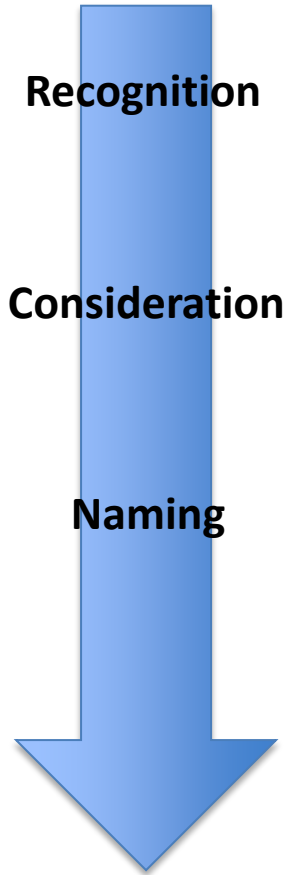

**Recognition**

**Consideration**

**Naming**

**REPORT**

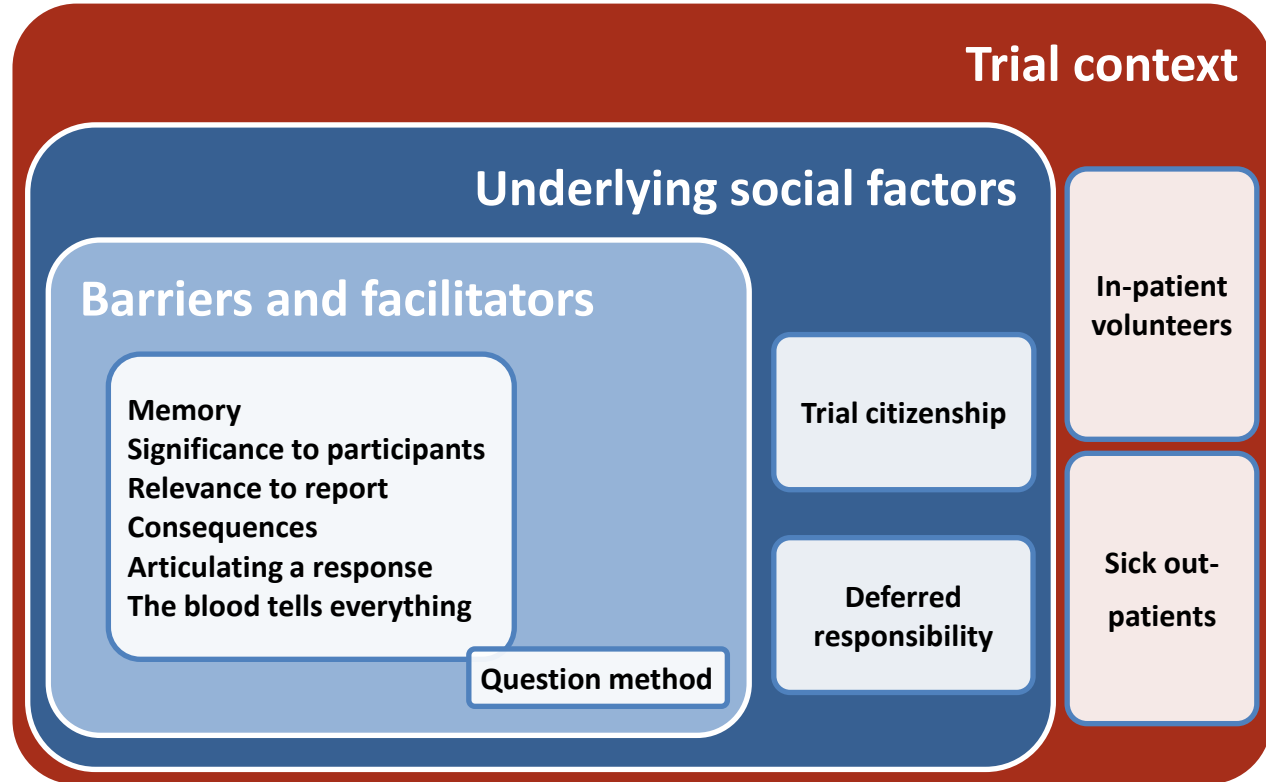

Supplement: MOESM4 [file 9433074]
